# Supplementary material
Source: PubMed Central journal article supplement (PMC3655712)
Supplement: NIHMS458430-supplement-1.pdf [file NIHMS458430-supplement-1.pdf]

**Supplementary Table S1: Antibodies used in this study**

| Antigen                                           | Species      | Clone    | Conjugation  | Cat #     | Source                    |
|---------------------------------------------------|--------------|----------|--------------|-----------|---------------------------|
| <b>Flow Cytometry and Fluorescence Microscopy</b> |              |          |              |           |                           |
| Trop-2                                            | mouse mAb    | 162.46.2 | Unconjugated | HB-187    | ATCC                      |
| Trop-2                                            | goat pAb     |          | Unconjugated | AF650     | R&D Biosystems            |
| $\beta_1$ integrin                                | goat pAb     |          | Unconjugated | AF1778    | R&D Biosystems            |
| $\beta_1$ integrin                                | mouse mAb    | TS2/16   | Unconjugated | HB-243    | ATCC                      |
| $\beta_3$ integrin                                | mouse mAb    | AP-3     | Unconjugated | HB-242    | ATCC                      |
| $\beta_5$ integrin                                | mouse mAb    | P1F6     | Unconjugated | MAB1961   | Millipore                 |
| $\alpha_5$ integrin                               | mouse mAb    | P1D6     | Unconjugated | MAB1956Z  | Millipore                 |
| $\alpha_V$ integrin                               | mouse mAb    | L230     | Unconjugated | HB-8448   | ATCC                      |
| Phospho-Akt (ser473)                              | rabbit pAb   |          | Unconjugated | sc-7985-R | Santa Cruz Biotechnology  |
| Vinculin                                          | mouse mAb    | FB11     | Unconjugated | MAB1624   | Millipore                 |
| Talin                                             | mouse mAb    | TA205    | Unconjugated | MAB1676   | Millipore                 |
| RACK1                                             | mouse mAb    | C20      | Unconjugated | 610177    | BD Transduction Labs      |
| Rab4                                              | mouse mAb    | 7        | Unconjugated | 610888    | BD Transduction Labs      |
| Rab11                                             | mouse mAb    | 47       | Unconjugated | 610656    | BD Transduction Labs      |
| <b>Immunoprecipitation</b>                        |              |          |              |           |                           |
| Trop-2                                            | mouse mAb    | T16      | Unconjugated |           | Gift of Dr. S. Alberti    |
| $\beta_1$ integrin                                | mouse mAb    | TS2/16   | Unconjugated | HB-243    | ATCC                      |
| $\alpha_V$ integrin                               | mouse mAb    | L230     | Unconjugated | HB-8448   | ATCC                      |
| <b>Immunoblotting</b>                             |              |          |              |           |                           |
| Trop-2                                            | goat pAb     |          | Unconjugated | AF650     | R&D Biosystems            |
| $\beta_1$ integrin                                | mouse mAb    | C18      | Unconjugated | 610468    | BD Transduction Labs      |
| $\beta_1$ integrin                                | goat pAb     |          | Unconjugated | AF1778    | R&D Biosystems            |
| $\beta_3$ integrin                                | rabbit serum |          | Unconjugated |           | Gift of Dr. E. Ruoslahti  |
| $\alpha_5$ integrin                               | rabbit serum |          | Unconjugated |           | Gift of Dr. E. Ruoslahti  |
| $\alpha_V$ integrin                               | rabbit serum |          | Unconjugated |           | Gift of Dr. E. Ruoslahti  |
| Rac1                                              | mouse mAb    |          | Unconjugated | 05-389    | Millipore                 |
| Rho                                               | mouse mAb    |          | Unconjugated | 05-778    | Millipore                 |
| FL-Talin                                          | mouse mAb    | 8d4      | Unconjugated | T3287     | Sigma-Aldrich             |
| Talin-H                                           | mouse mAb    | TA205    | Unconjugated | MAB1676   | Millipore                 |
| Kindlin-1                                         | rabbit pAb   |          | Unconjugated |           | Gift of Dr. C. Has        |
| RACK1                                             | mouse mAb    | C20      | Unconjugated | 610177    | BD Transduction Labs      |
| FAK                                               | rabbit pAb   |          | Unconjugated | sc-558    | Santa Cruz Biotechnology  |
| Phospho-PAK4 (ser474)                             | rabbit pAb   |          | Unconjugated | 3241      | Cell Signaling            |
| PAK4                                              | rabbit pAb   |          | Unconjugated | 3242      | Cell Signaling            |
| <b>Integrin inhibitory Abs</b>                    |              |          |              |           |                           |
| $\beta_1$ integrin                                | rat mAb      | A1IB2    | Unconjugated |           | Aragen Bioscience         |
| <b>Negative ctr. Abs</b>                          |              |          |              |           |                           |
| mouse IgG                                         |              |          | Unconjugated | 31903     | Pierce/Thermo Fisher Sci. |
| rat IgG                                           |              |          | Unconjugated | 31933     | Pierce/Thermo Fisher Sci. |
| goat IgG                                          |              |          | Unconjugated | sc-2028   | Santa Cruz Biotechnology  |
| <b>Secondary Abs</b>                              |              |          |              |           |                           |
| anti mouse                                        | goat pAb     |          | Alexa 488    | A11029    | Invitrogen                |
| anti mouse                                        | goat pAb     |          | FITC         | 55493     | MP Bio                    |
| anti mouse                                        | rabbit pAb   |          | Alexa 488    | A21204    | Invitrogen                |
| anti rabbit                                       | goat pAb     |          | Alexa 633    | A21071    | Invitrogen                |
| anti goat                                         | donkey pAb   |          | Alexa 633    | A21082    | Invitrogen                |
